# Supplementary figures and images for: A Randomized Controlled Clinical Trial of a Patient Decision Aid for Posttraumatic Stress Disorder
Source: Atypon-hosted journal article supplement (doi:10.1176/appi.ps.201400062), 2014-12-17

Figure 1: Consort Diagram

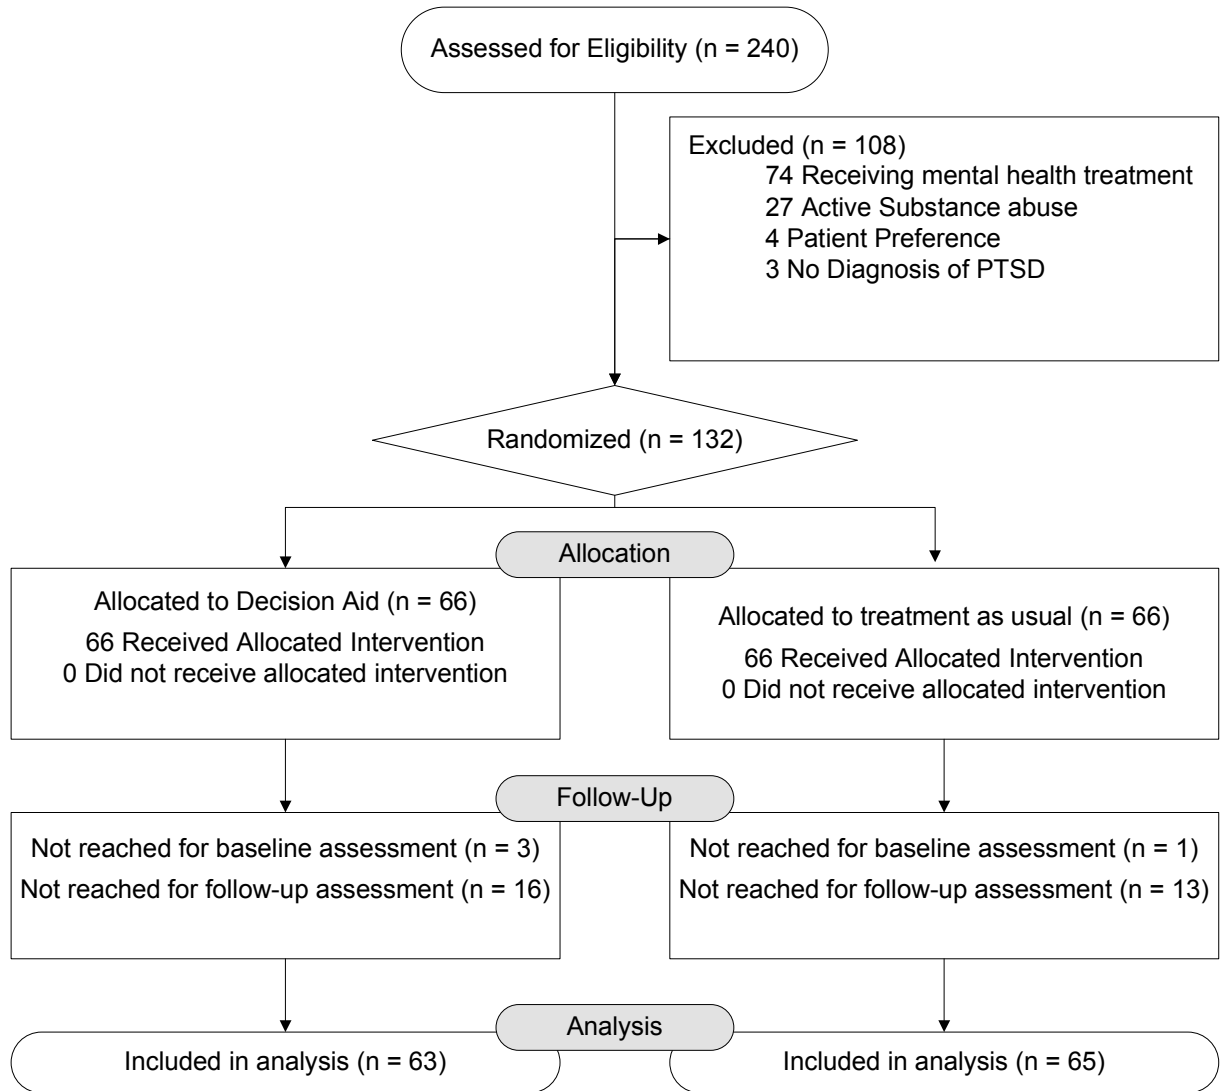

Supplement: appi.ps.201400062.ds001.pdf [file appi.ps.201400062.ds001.pdf]
